# Supplementary material for: RNA templated water soluble Mg2+/PbSe porous nanostructures with dual fluorescence
Source: Royal Society of Chemistry journal article supplement (doi:10.1039/c2ra20878d), 2012-01-01
Supplement: c2ra20878d.pdf [file c2ra20878d.pdf]

# RNA templated water soluble $Mg^{2+}/PbSe$ porous nanostructures with dual fluorescence

Anil Kumar\* and Bhupender Singh

Department of Chemistry  
Indian Institute of Technology Roorkee,  
Roorkee - 247667, India

E-mail: [anilkfcy@iitr.ernet.in](mailto:anilkfcy@iitr.ernet.in); Tel.: +91-1332-285799; Fax: +91-1332-273560

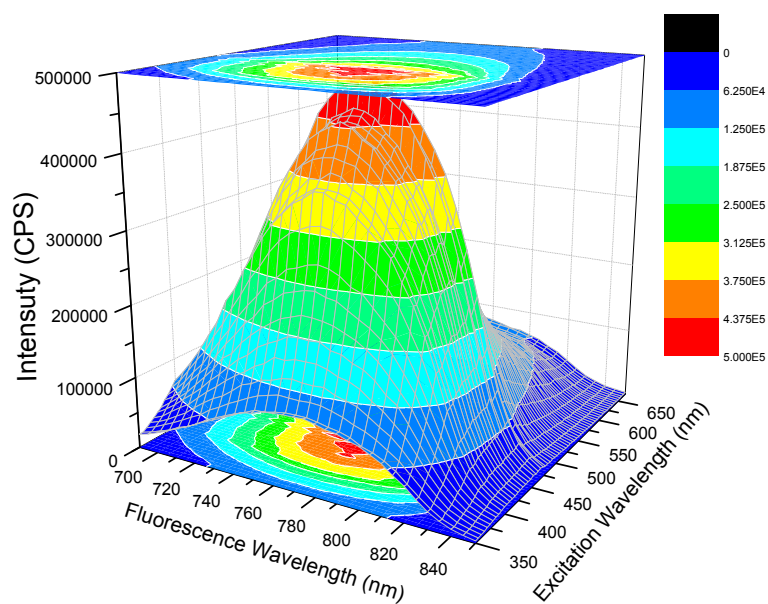

Fig.S1a 3D excitation – fluorescence spectra of SP1 in visible region.

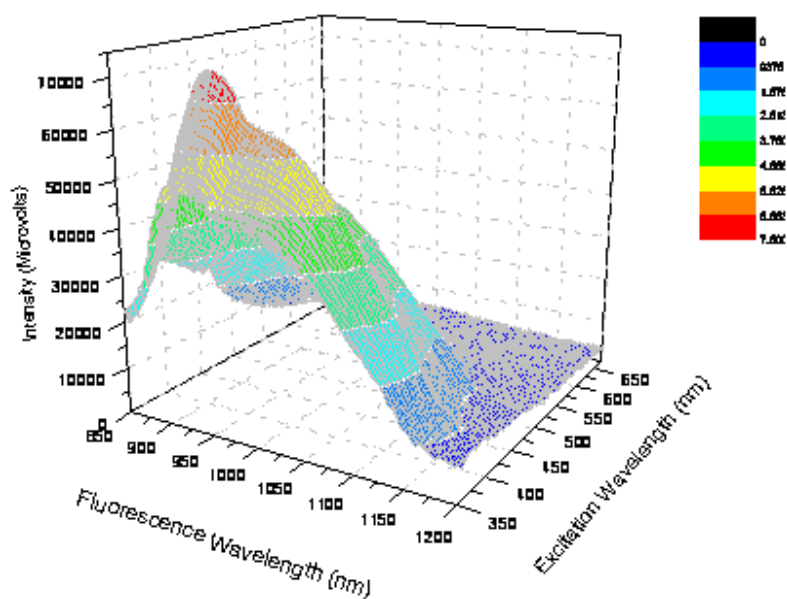

Fig. S1b Optimization of excitation and fluorescence wavelength in NIR region.

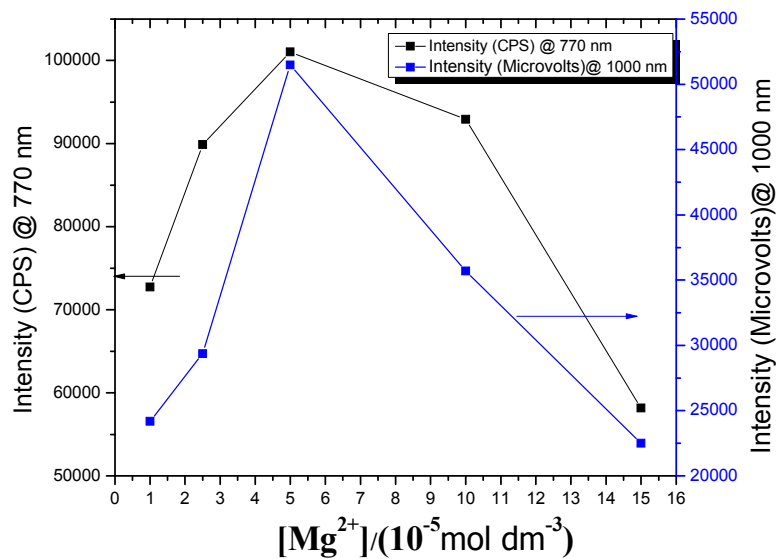

Fig. S1c Effect of internal addition of  $[Mg^{2+}] / (10^{-5} \text{ mol dm}^{-3})$  (1.0, 2.5; 5.0; 10.0; 15.0) on fluorescence peak in visible (left) NIR (right) range.

## AFM grain/pore analysis histograms

### Grain Analysis SP1 Fresh

Grains Size: 2.0 nm; Grains collected: 225

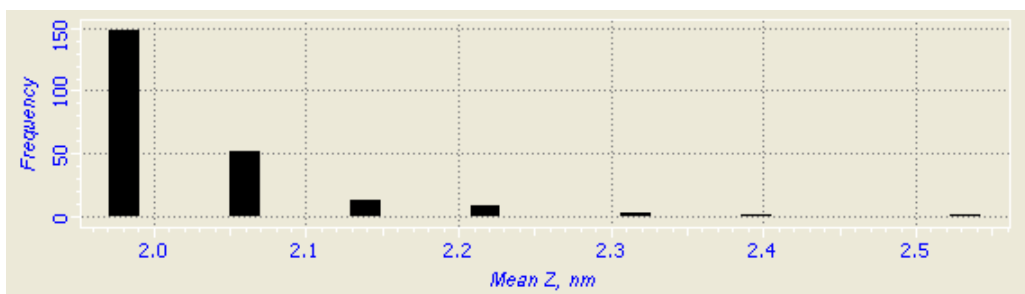

Fig. S2a Histogram of Fresh SP1.

### Pores Analysis SP1 aged

Pore Size: 3.2 nm; Pores collected: 191

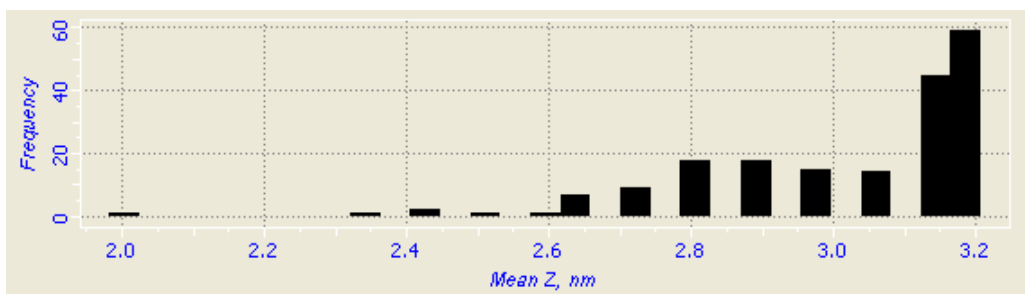

Fig. S2a' Histogram of aged SP1.

### Pores Analysis of Fresh SP2

Pore Size: 2.5 nm; Pores collected: 512

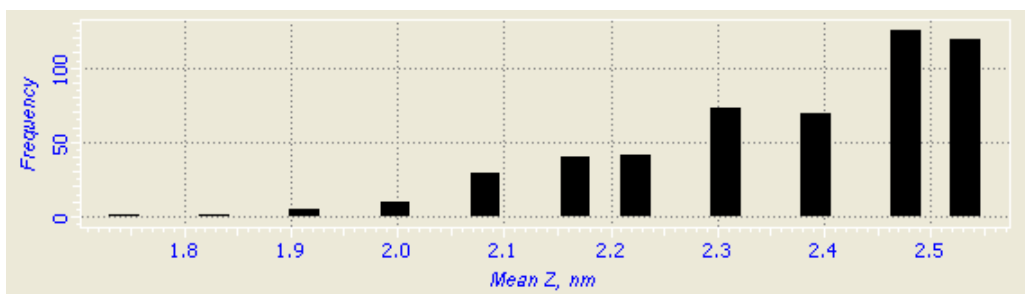

Fig. S2b Histogram of fresh SP2.

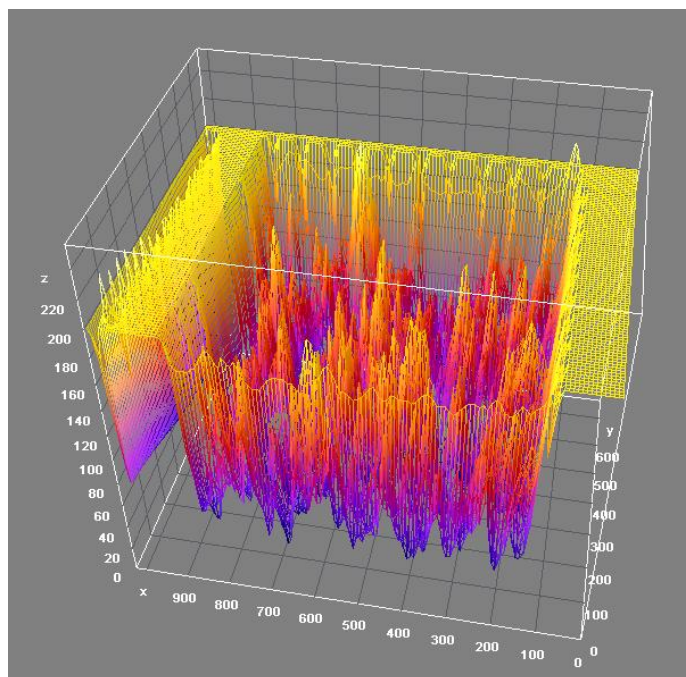

**Fig. S2b'** 3D view of AFM image of SP2 (fresh) with the help of *image J* software.

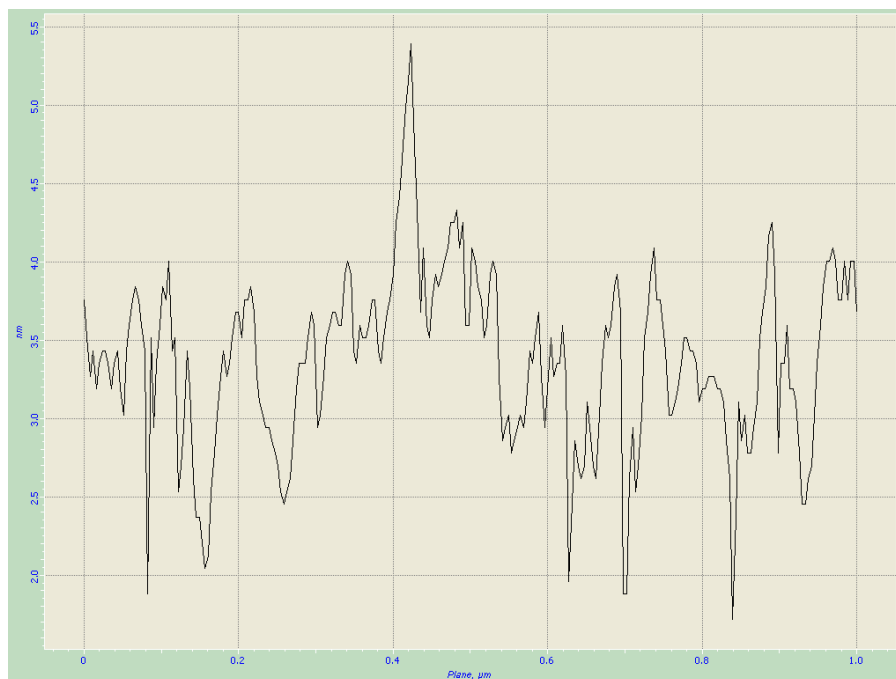

**Fig. S2c** Depth of pores of fresh SP2 along Y axis

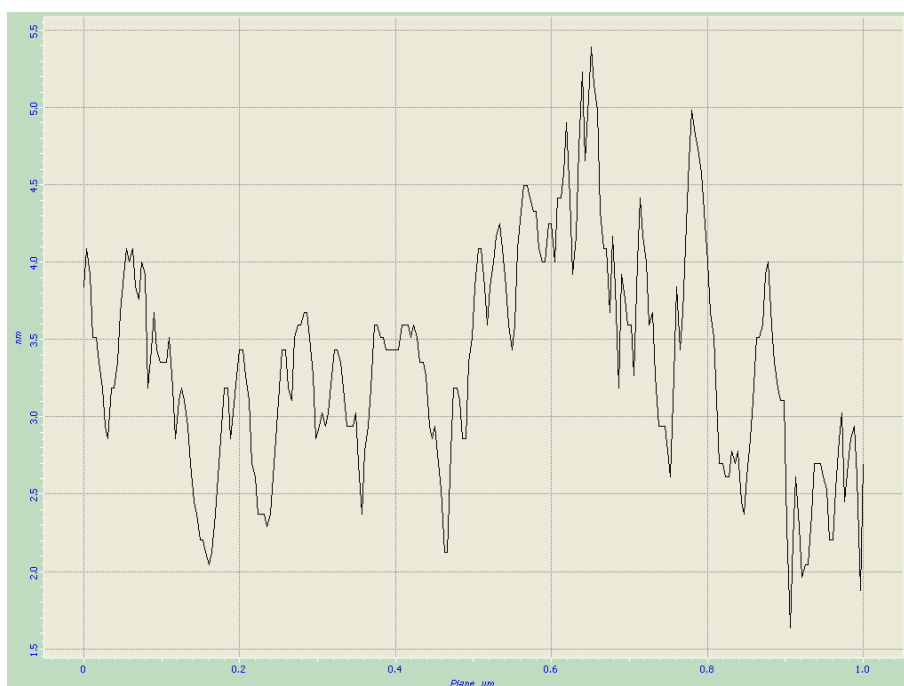

**Fig. S2d** Depth of pores of fresh SP2 along X axis.

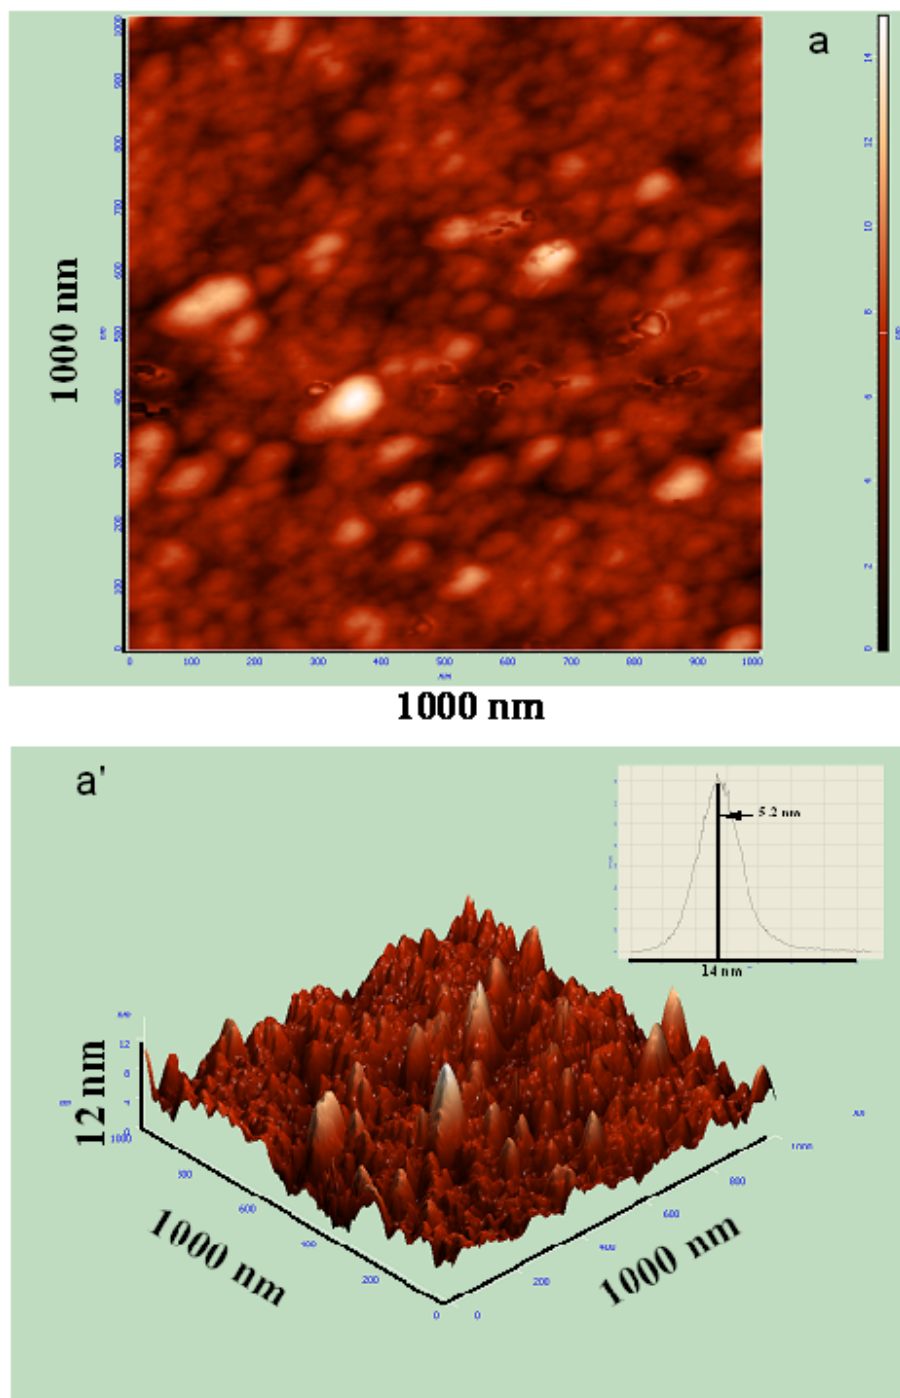

**Fig. S2d'** AFM images of fresh SP3: 2D (a) and 3D (a'), Inset: Roughness histogram.

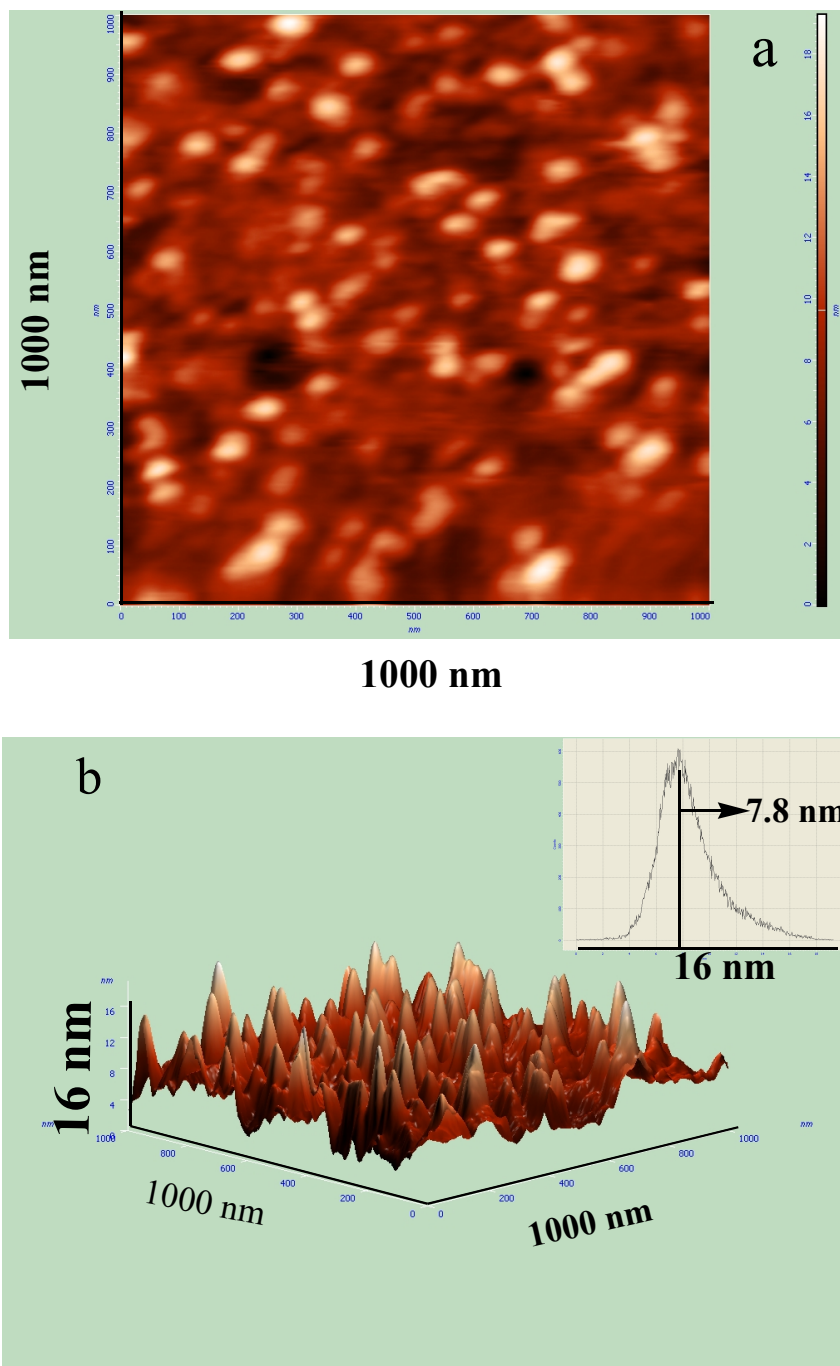

**Fig. S3A** AFM images of fresh SB: 2D (a) and 3D (b); Inset: Roughness histogram

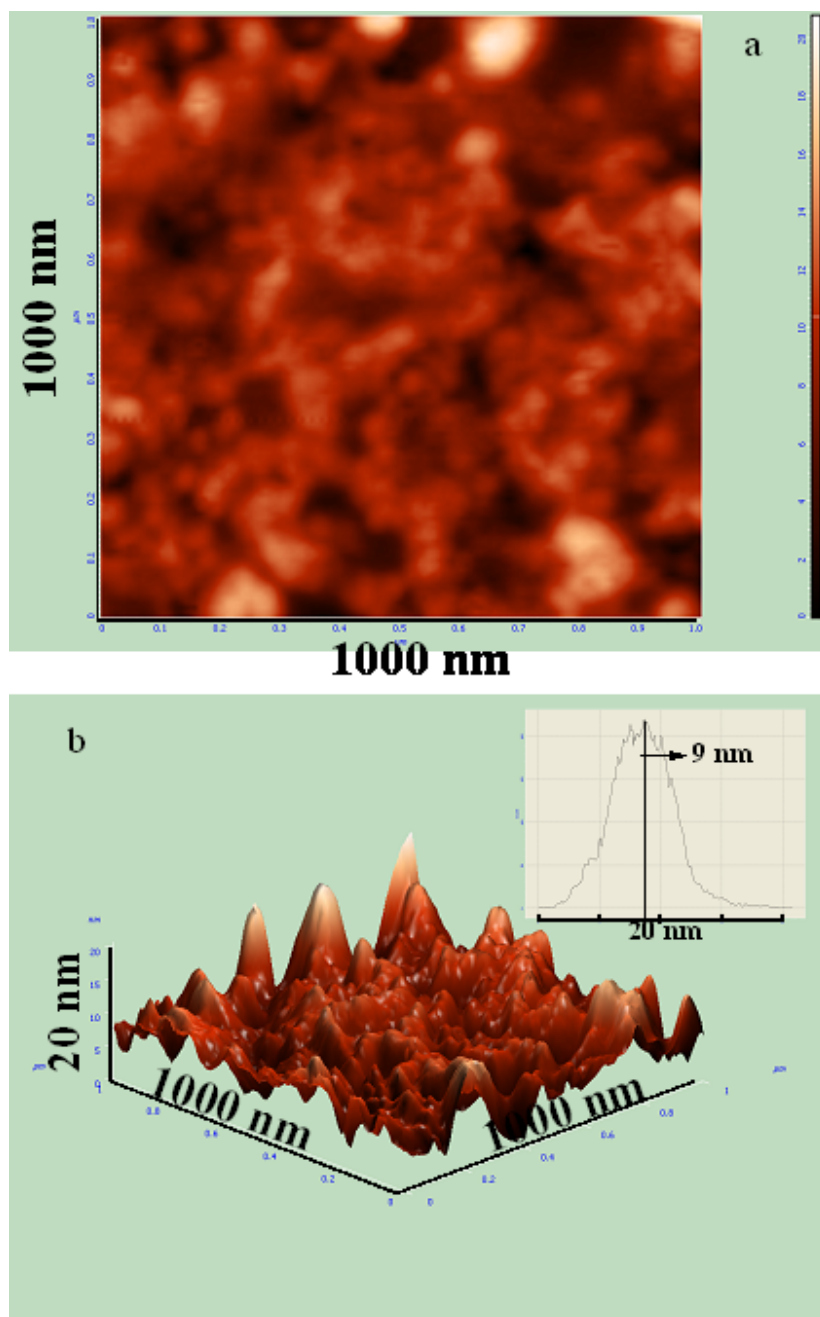

**Fig. S3B** AFM images of fresh SB1: 2D (a) and 3D (b), Inset: Roughness histogram.



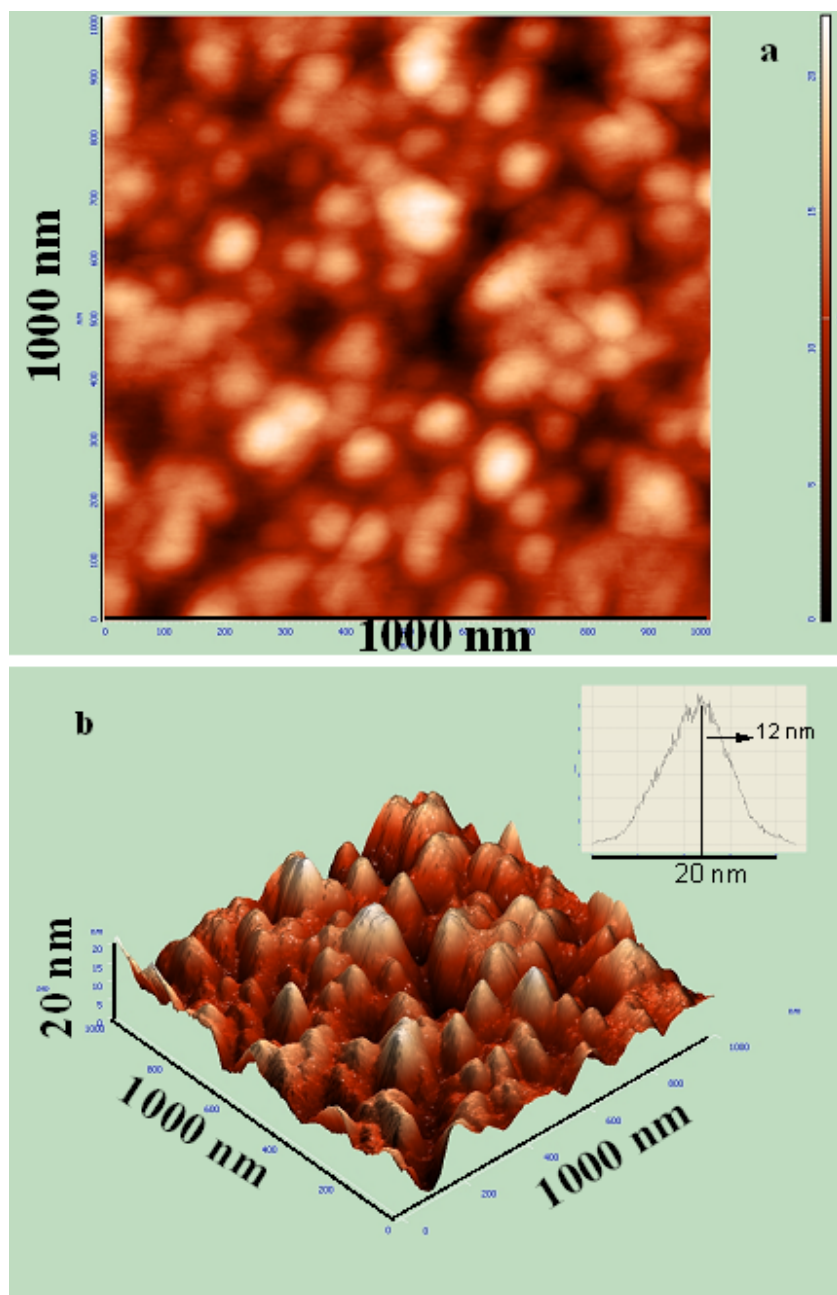

**Fig. S3B'** AFM images of aged SB1: 2D (a) and 3D (b). Inset: Roughness histogram.

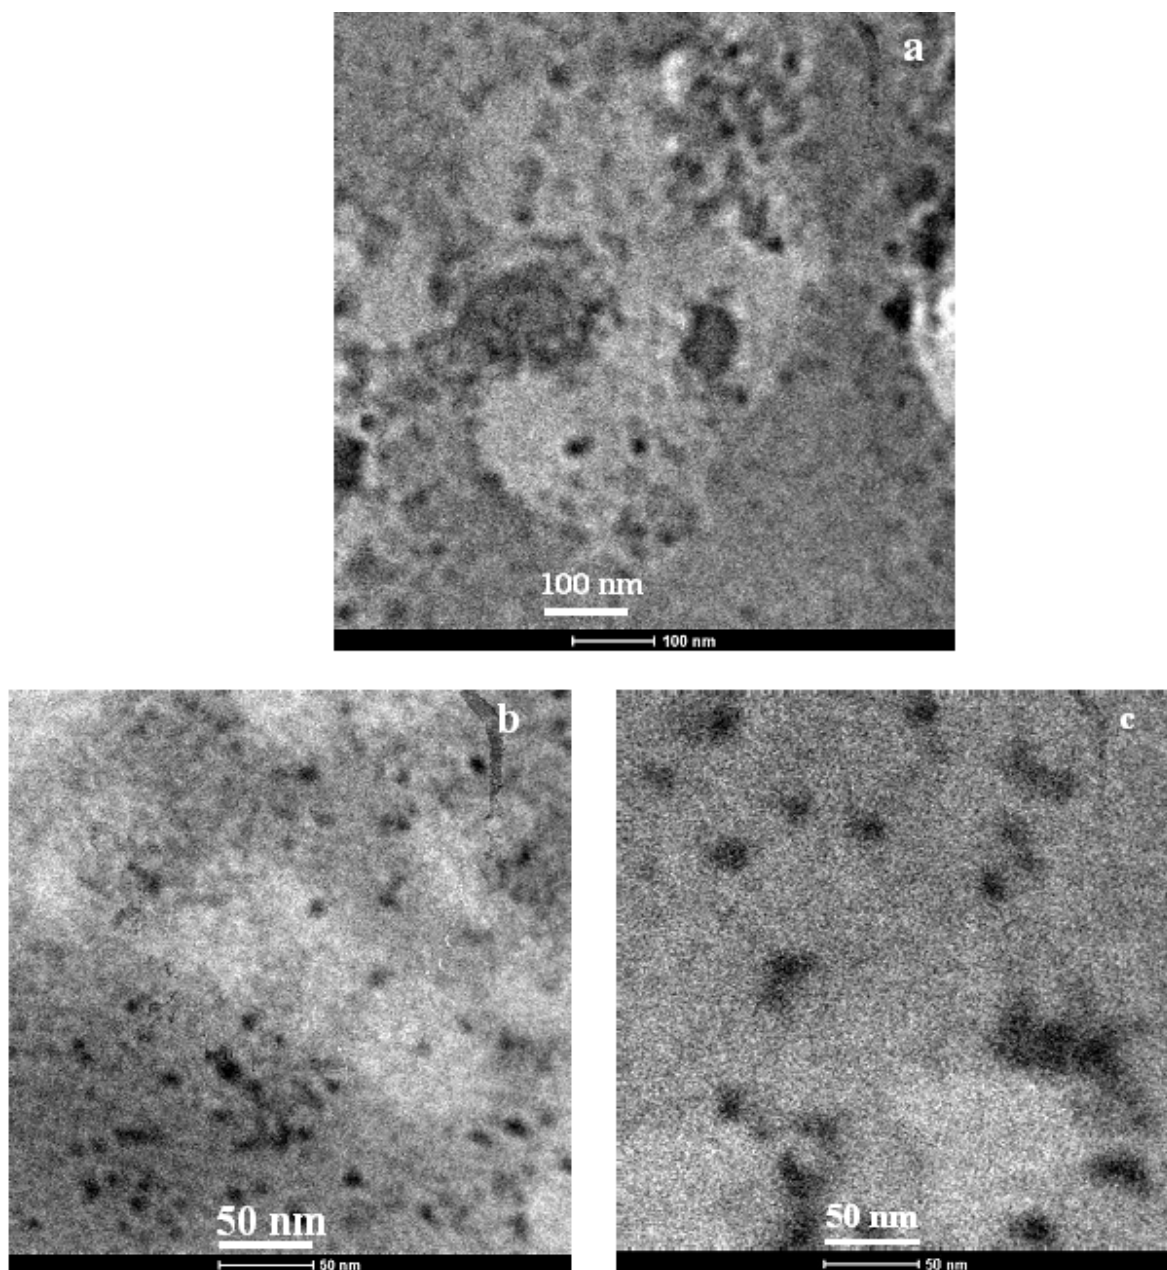

**Fig.S4** TEM micrographs of SB (a), SB1 (b) and SB2 (c).

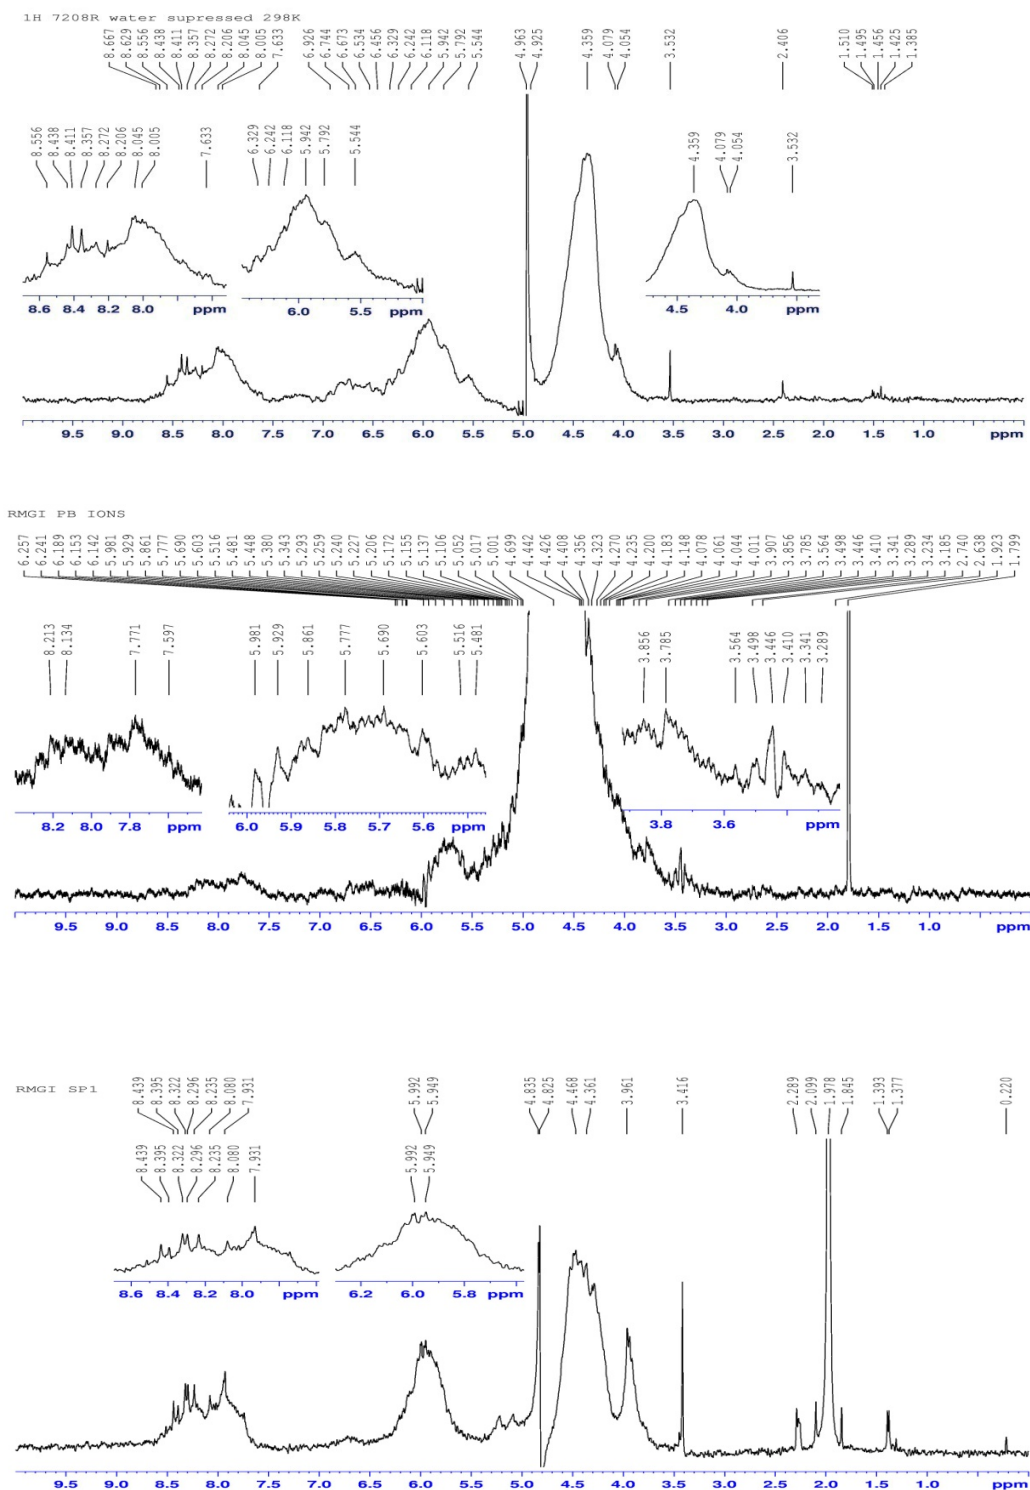

Fig. S5A <sup>1</sup>H NMR spectra of SB, SB1, and SP1 (top to bottom)

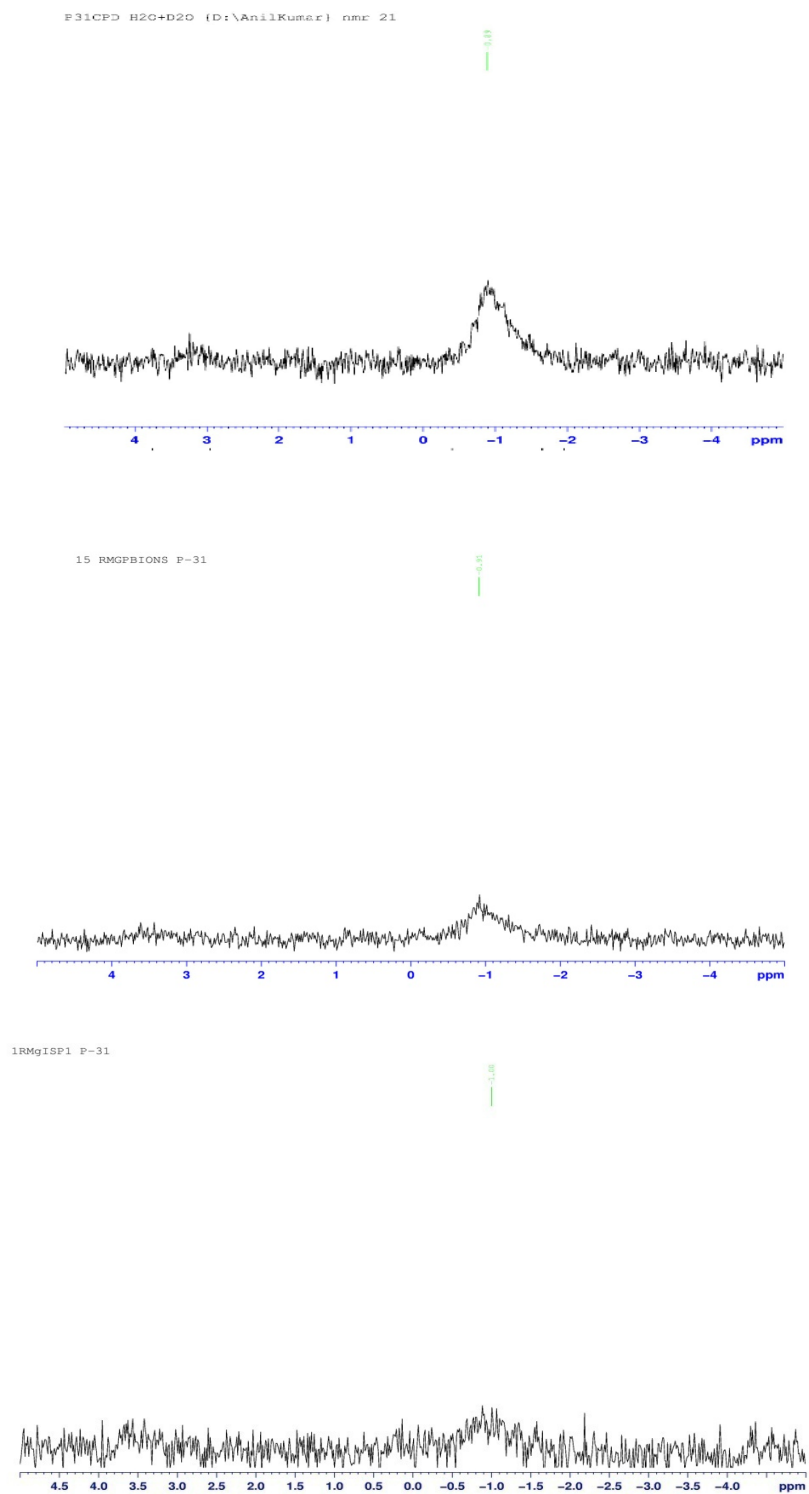

**Fig. S5B**  $^{31}\text{P}$  NMR spectra of SB, SB1, and SP1 (top to bottom)

### Fluorescence Decay Curves at $\lambda_{em} = 770$ nm

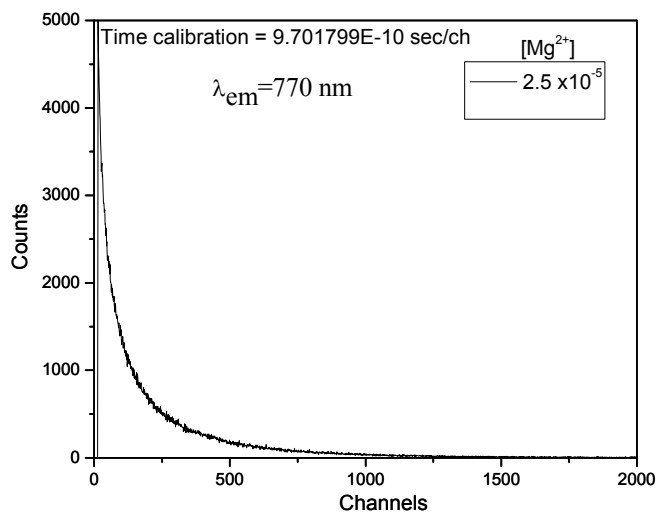

**Fig.S6A**

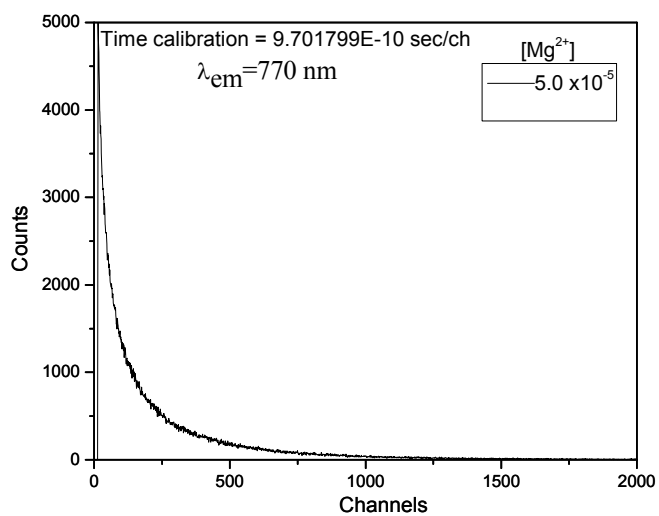

**Fig.S6B**

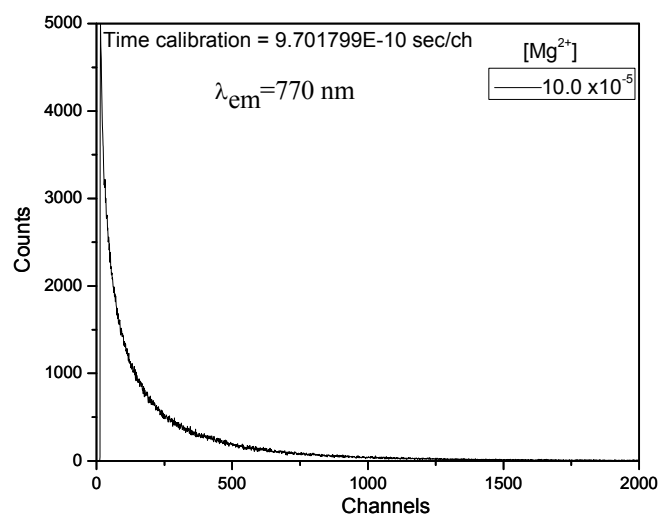

**Fig.S6C**

**Fluorescence Decay Curves at  $\lambda_{em} = 1000\text{ nm}$**

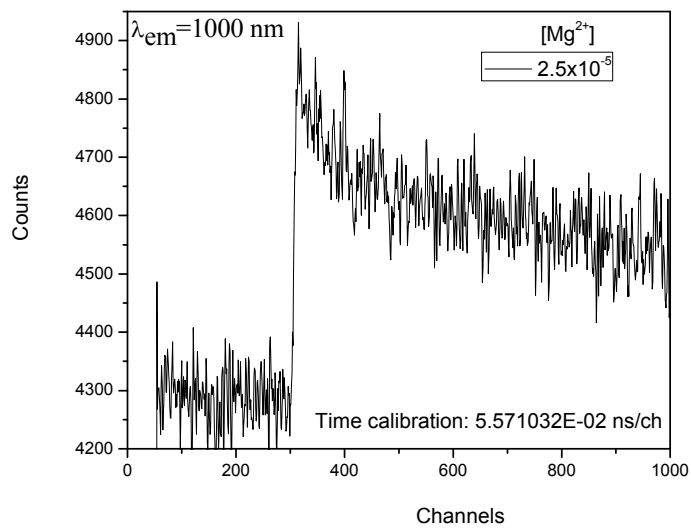

**Fig.S7A**

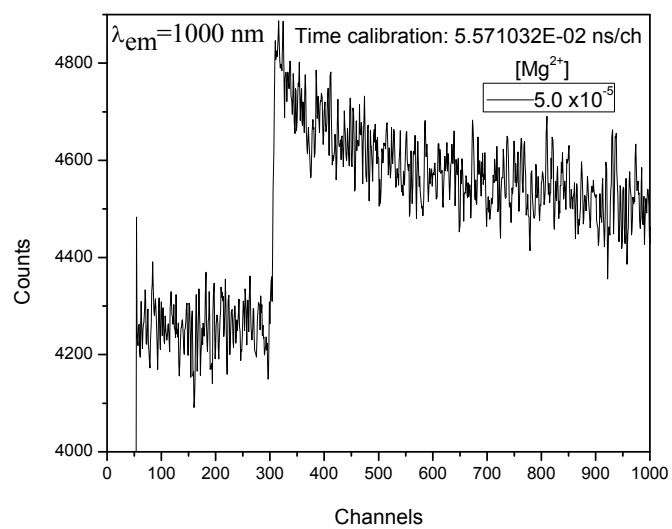

**Fig.S7B**

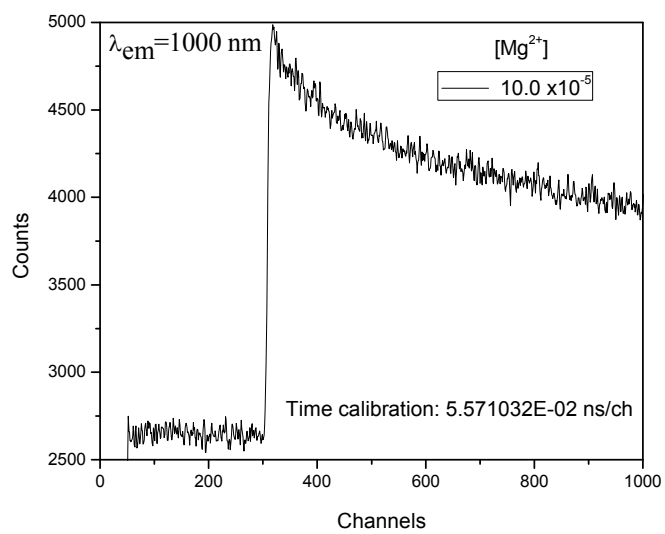

**Fig.S7C**

**Table S1: XRD spectral data for SP1**

| Angle ( $2\theta$ ) | ( <i>hkl</i> ) | Lattice parameter ( <i>a</i> ) in Å |
|---------------------|----------------|-------------------------------------|
| 29.13               | (200)          | 6.130                               |
| 41.59               | (220)          | 6.134                               |
| 49.34               | (311)          | 6.120                               |

**Table S2 IR spectral data:**

| Moiety (constituent) /Functional group       | RNA ( $\text{cm}^{-1}$ ) (SB) | Mg <sup>2+</sup> + Pb <sup>2+</sup> on RNA matrix ( $\text{cm}^{-1}$ ) (SB1) | Mg <sup>2+</sup> + Pb <sup>2+</sup> / PbSe on RNA matrix ( $\text{cm}^{-1}$ ) (SP1) |
|----------------------------------------------|-------------------------------|------------------------------------------------------------------------------|-------------------------------------------------------------------------------------|
| In plane vibrations: G&U                     | 1693 (br)                     | 1690 (br) Change in shape                                                    | 1690 (br) Change in shape                                                           |
| A&C                                          | 1642 (m)                      | 1651(s)                                                                      | 1651(s) Change in shape                                                             |
| G                                            | 1544(m)                       | 1570(br)                                                                     | 1570 (s) Change in shape                                                            |
| U (medium)                                   | 1469(m)                       | 1487(br)                                                                     | 1487 (br) Change in shape                                                           |
| In plane C2'-OH                              | 1421(br)                      | 1413(s)                                                                      | 1413 (s) Change in shape                                                            |
| Purine in anti confm.                        | 1385(s)                       | 1385(sh)                                                                     | disappeared                                                                         |
| Purine in syn confm.                         | 1355 (sh)                     | 1341 (m)                                                                     | 1345 (br)                                                                           |
| C                                            | 1281 (sh)                     | 1281 (br)                                                                    | disappeared                                                                         |
| Assym. Stretch PO <sub>2</sub> <sup>2-</sup> | 1227 (s)                      | 1240 (s)                                                                     | 1240 (m)                                                                            |
| In Ribose vib. due to 2'-OH                  | 996 (br)                      | disappeared                                                                  | disappeared                                                                         |
| RNA backbone                                 | 966 (m)                       | 968 (br)                                                                     | 971 (br)                                                                            |

*s*-strong; *m*- medium; *sh*- shoulder; *br*- broad
